# Supplementary material
Source: PubMed Central journal article supplement (PMC4861207)

## Supplementary data

### Expression of serum amyloid A transcripts in human bone tissues, differentiated osteoblast-like stem cells and human osteosarcoma cell lines

Alenka Kovacevic, Astrid Hammer, Elke Stadelmeyer, Werner Windischhofer, Monika Sundl, Alpana Ray, Natascha Schweighofer, Gerald Friedl, Reinhard Windhager, Wolfgang Sattler and Ernst Malle

## Figure legends

### Figure I

*Alizarin Red staining of hMSC:* hMSCs cells were cultured either in expansion (A, B) or in osteogenic medium (C, D) for 3 weeks and stained with Alizarin Red S. A staining solution (1% Alizarin Red S in 2% (w/v) EtOH) was prepared. The medium was removed, the cells were washed once with preheated 37°C PBS, fixed with 10% formaldehyde for 10 min, washed again with distilled water and incubated with the staining solution for 5 min. After incubation the staining solution was removed and the cultures were washed 5 times with distilled water to get rid of excessive color.

### Figure II

*RT-PCR of cytokine receptors, SAA and SAF-1 transcripts in human osteosarcoma cells:* SAOS-2 cells were stimulated with different cytokines (10 ng/ml) for 24 h. (A) Cytokine receptor transcripts as well as (B) SAA and SAF-1 transcripts were amplified using specific

oligonucleotide primers (Table I). The PCR products were separated on 1.5% agarose gels. NS (non stimulated); P (positive control: RNA was isolated from HUH-7 cells for SAF-1, SAA, cytokine receptors except IL-1R2, where RNA from THP-1 cells was used); N1 (negative control, RNA template: negative controls were done for all samples); N2 (negative control, water template). To ensure that equal amount of cDNA was used as a template RT-PCR for GAPDH was made as a control. One representative experiment out of three is shown.

### **Figure III**

*Time-dependent expression of SAA in osteosarcoma cells: (A) MG-63 and (B) SAOS-2 cells, non-treated or stimulated with 10 ng/ml IL-1 $\beta$  for 24 h, were cultured on Lab-Tek chamber slides as described in Materials and Methods. Labelling was performed using sequence-specific polyclonal anti-human SAA1/2 (position 89-104) or SAA4 peptide (position 94-112) antisera as primary antibodies, followed by 30 min incubation with cyanine-3-labeled goat anti-rabbit IgG. One representative experiment out of three is shown. The x/y dimension of the scanned field is 120  $\mu$ m.*

### **Figure IV**

*RT-PCR of SR-BI/II and FPRL-1/ALX in human osteosarcoma cells: SAOS-2 were stimulated with different cytokines (10 ng/ml) for 24 h. Human SR-BI/II, and FPRL-1/ALX transcripts were amplified using specific oligonucleotide primers (Table I). The PCR products were separated on 1% agarose gels. NS (non stimulated); P (positive control: RNA was isolated from THP-1 cells for SR-BI/II; for FPRL-1/ALX, HUH-7 genomic DNA was used); N1 (negative control, RNA template: negative controls were done for all samples); N2 (negative control, water template). To ensure that equal amount of cDNA was used as a template RT-PCR for GAPDH was made as a*

control. One representative experiment out of three is shown.

**Figure V.**

*RT-PCR of FPRL-1/ALX in human osteosarcoma cells in the presence of dexamethasone* : MG-63 and SAOS-2 were seeded in 6-well plates and, upon reaching 80% confluency, stimulated for 24 h by adding dexamethasone (Dex, 1 or 2  $\mu$ M) in the absence or presence of 10 ng/ml IL-1 $\beta$  or IL-6. Human *FPRL-1/ALX* transcripts were amplified using specific oligonucleotide primers (*Table I*). The PCR products were separated on 1% agarose gels. NS (non stimulated); P (positive control, HUH-7 genomic DNA); N1 (negative control, RNA template: negative controls were done for all samples); N2 (negative control, water template). To ensure that equal amount of cDNA was used as a template RT-PCR for GAPDH was made as a control. One representative experiment out of three is shown.

**Table I**

Primers, expected amplicon size (bp), and unique PCR properties (cycle number and annealing temperature)

| <b>Gene</b><br>Accession<br>Nr.                         | <b>Primers (start position on + strand)</b>                                                                 | <b>bp</b> | <b>cycles</b> | <b>°C</b> |
|---------------------------------------------------------|-------------------------------------------------------------------------------------------------------------|-----------|---------------|-----------|
| <b>SAA1</b><br><b>NM_000331</b>                         | F 5' CAG ACA AAT ACT TCC ATG CT 3' (373)<br>R 5' ATT GTG TAC CCT CTC CCC 3' (658)                           | 303       | 40            | 53        |
| <b>SAA2</b><br><b>NM_030754</b>                         | F 5' CAG ACA AAT ACT TCC ATG CT 3' (172)<br>R 5' ATT ATA TGC CAT ATC TCA GC 3' (479)                        | 327       | 40            | 55        |
| <b>SAA4</b><br><b>NM_006512</b>                         | F 5' CCA GTG AAA GCT GGC GTT CG 3' (125)<br>R 5' GAG AAG TGT GTG GCT CAC AGC C 3' (500)                     | 397       | 40            | 55        |
| <b>SAF-1/2</b><br><b>NM_002383</b><br><b>AF489858 *</b> | F 5' GCC AGG GTC CTC ACC ATG TCT G 3'<br>(1407/1353*)<br>R 5' CAA CTT GGA GCT CAC CAG GG 3'<br>(1577/1761*) | 190/428   | 30            | 59        |
| <b>IL-1R1</b><br><b>NM_000877</b>                       | F 5' TGC TTA CTG GAA GTG GAA TGG 3' (853)<br>R 5' CCT CAG GCA AGA CTT TAA ACA C 3' (1301)                   | 470       | 30            | 58        |
| <b>IL-1R2</b><br><b>NM_004633</b>                       | F 5' GCA ATG TTG CGC TTG TAC GTG 3' (227)<br>R 5' GTC TTT ATC CAA AAG AAG AG 3' (747)                       | 540       | 30            | 59        |
| <b>IL-6R</b><br><b>NM_000565</b>                        | F 5' AGA GGC GTG CTG ACC AGT CTG 3' (531)<br>R 5' ACG GCT CCT GGA AGT CTT CGG 3' (910)                      | 400       | 40            | 63        |
| <b>TNFR1</b><br><b>NM_001065</b>                        | F 5' TCG ATT TGC TGT ACC AAG T 3' (447)<br>R 5' GAA AAT GAC CAG GGG CAA CAG 3' (918)                        | 492       | 30            | 62        |
| <b>SR-BI/II</b><br><b>NM_005505</b>                     | F 5' TCT ACC CAC CCA ACG AAG GCT 3' (1007)<br>R 5' AGA AGC GGG GTG TAG GGA CTG G 3' (1655)                  | 669/540   | 30            | 58        |
| <b>FPRL-1</b><br><b>NM_001005</b><br><b>738</b>         | F 5' CTG CTG GTG CTG CTG GCA AG 3' (26)<br>R 5' AAT ATC CCT GAC CCC ATC CTC A 3' (1099)                     | 1095      | 30            | 62        |
| <b>GAPDH</b><br><b>M17851</b>                           | F 5' ACA GTC CAT GCC ATC ACT GCC 3'(562)<br>R 5' GCC TGC TTC ACC ACC TTC TTG 3' (827)                       | 265       | 30            | 58        |

\* refers to *SAF-2*

Figure I.

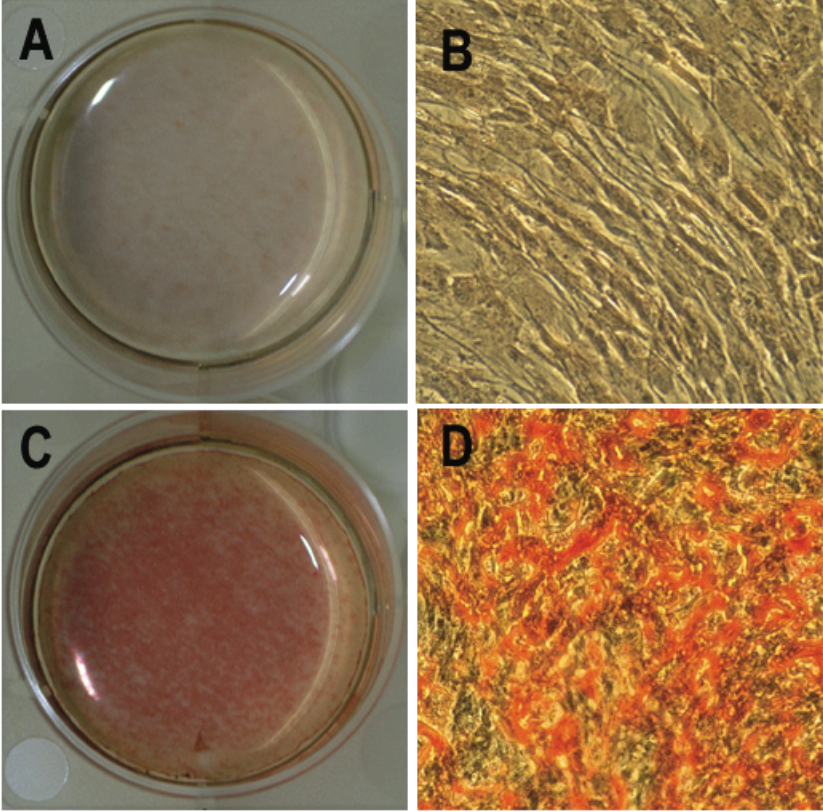

Figure II.

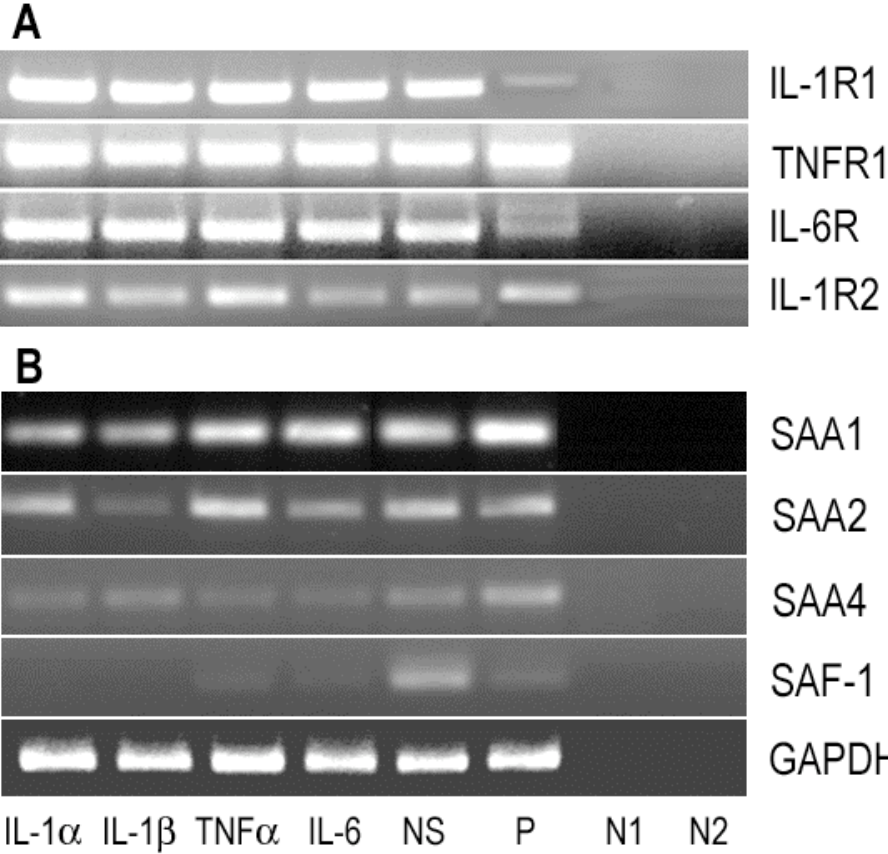

**Figure III.**

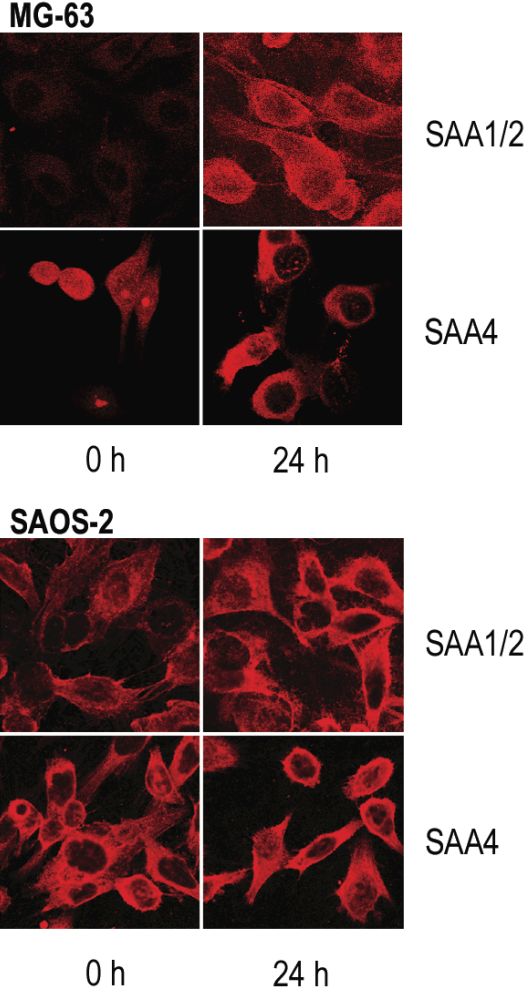





**Figure V.**

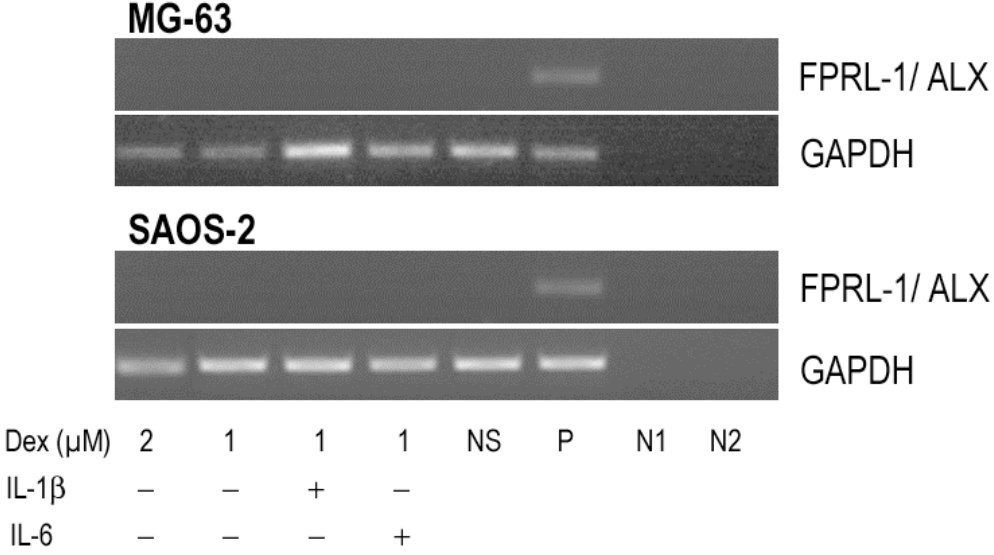

Supplement: NIHMS34545-supplement-Kova-Suppl.pdf [file NIHMS34545-supplement-Kova-Suppl.pdf]
